# Supplementary material for: A flexible high-sensitivity piezoresistive sensor comprising a Au nanoribbon-coated polymer sponge
Source: Royal Society of Chemistry journal article supplement (doi:10.1039/c5tc01604e), 2015-01-01
Supplement: c5tc01604e1.pdf [file c5tc01604e1.pdf]

## Supporting Information

### Flexible high-sensitivity piezoresistive sensor comprising of Au nanoribbon-coated polymer sponge

*Xiuxiu Yin, T. P. Vinod, and Raz Jelinek\**

Department of Chemistry, Ben Gurion University of the Negev, Beer Sheva 84105, Israel

**Table S1.** Mechanical properties of the PU sponge.

| Sample                    | original PU sponge | PU sponge after chemical treatment | PU sponge after Au coating |
|---------------------------|--------------------|------------------------------------|----------------------------|
| Young's Modulus/KPa       | 29                 | 4.8                                | 5.1                        |
| Stress at 50% Strain/ KPa | 3.1                | 1.3                                | 1.4                        |

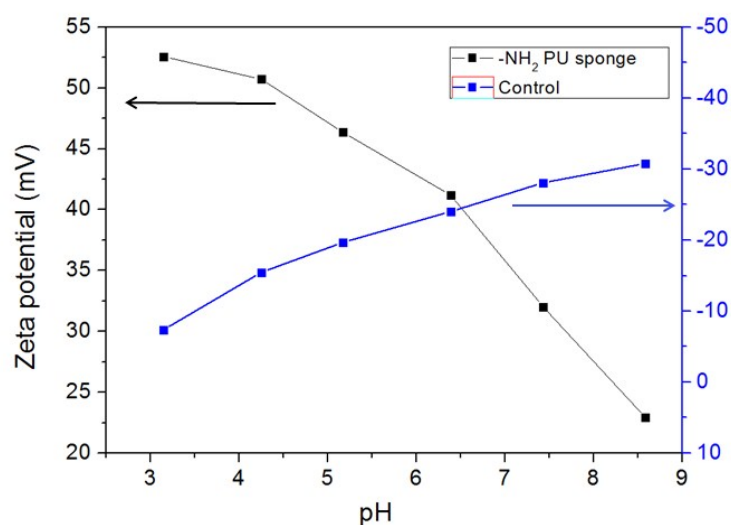

**Fig. S1. pH-dependent zeta potential of PU sponge before and after amine functionalization.** The surface zeta potential of the PU sponge as a function of pH was measured using a Zeta PALS (Brookhaven Instrument Corp.). Before amine functionalization, the surface charge of PU sponge is negative, while after functionalization it was highly positive, indicating successful introduction of amine groups on the sponge surface.

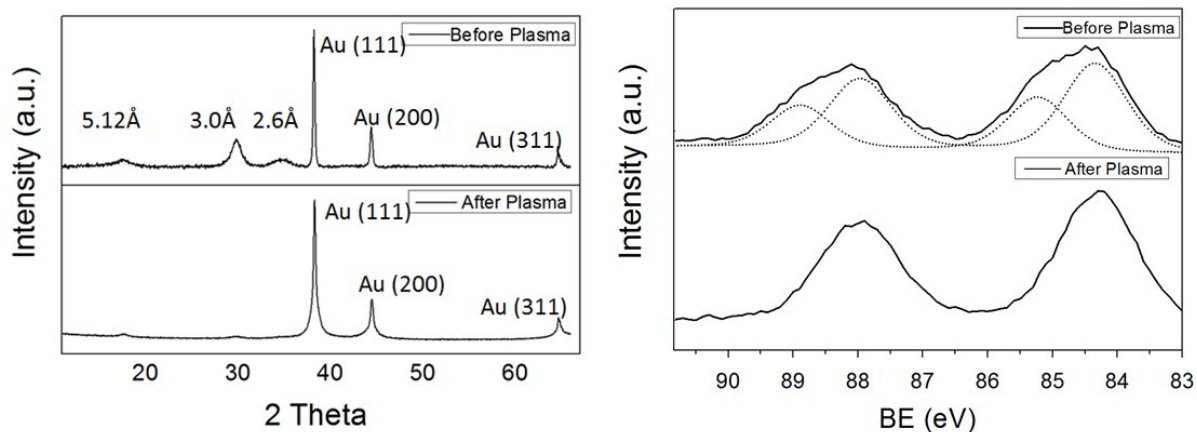

**Fig. S2. Effect of plasma treatment on gold species. A.** XRD spectra showing the elimination of ionic species assigned to  $\text{Au}^{\text{I}}$ ; **B.** XPS spectra highlighting the superimposed peaks of  $\text{Au}^{\text{I}}$  and  $\text{Au}^0$  before plasma treatment.

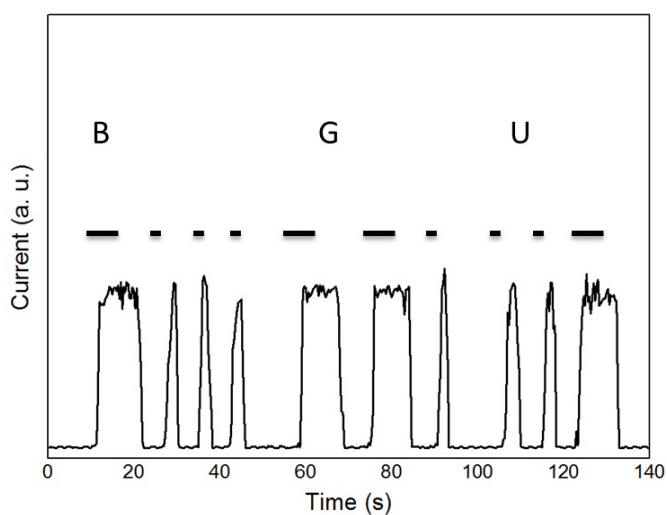

**Fig. S3. Temporal and static signals produced by touching the sensor with a finger, representing the signals of “BGU” in Morse code.** The current curve was measured under a constant bias of 1V.

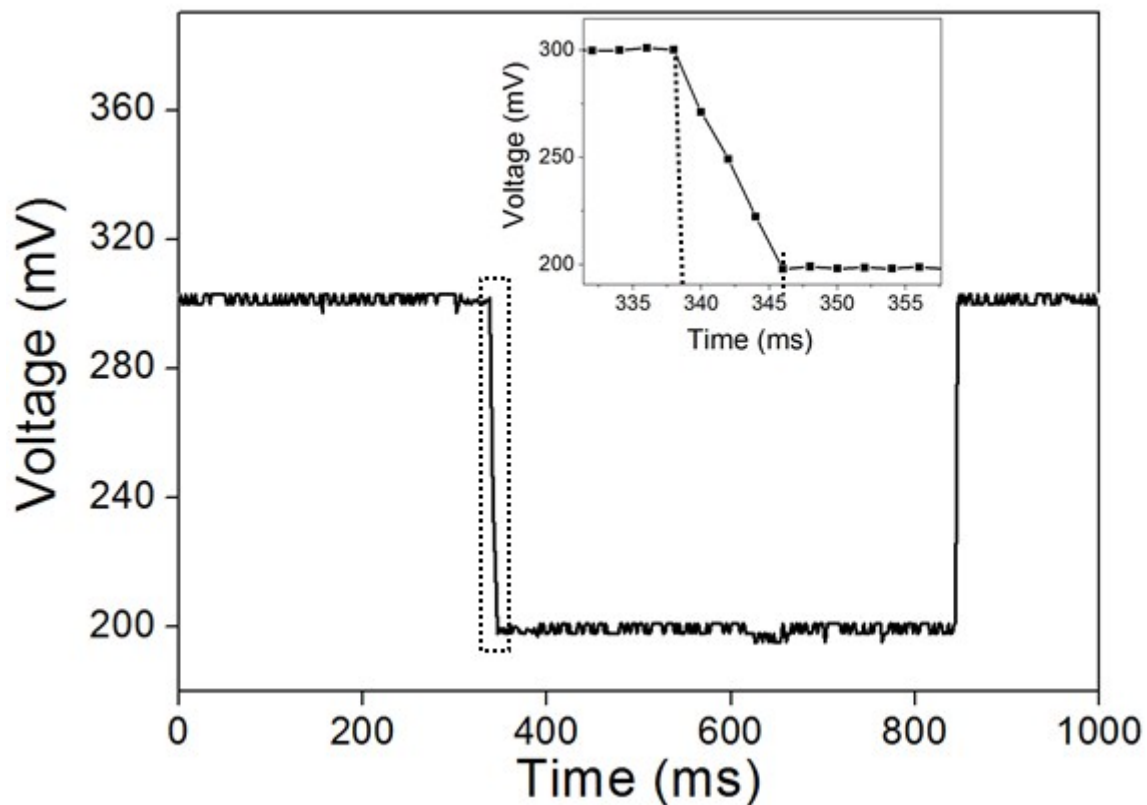

**Fig. S4. Response time of the pressure sensor with an applied pressure of 100 Pa.** Response time was recorded on an oscilloscope (Tektronix TDS 1002B). The inset shows the section of the curve within the dashed lines which corresponds to the application of pressure. The response time was 8 ms.

## References

- [1] A. Morag, N. Froumin, D. Mogiliansky, V. Ezersky, E. Beilis, S. Richter and R. Jelinek, *Adv. Funct. Mater.*, 2013, 23, 5663.
